# Supplementary material for: Climate change metrics: IPCC AR6 updates, discussions and dynamic assessment applications
Source: Copernicus journal article supplement (doi:10.5194/egusphere-2024-3918), 2025-02-03
Supplement: Supplementary file 1 [file egusphere-2024-3918-supplement.pdf]

**S1 - Analytical solutions of AGWP and AGTP metrics for valid CO<sub>2</sub>, CH<sub>4</sub> and N<sub>2</sub>O.**

$$AGWP_{CO_2}(H) = A_{CO_2} \left\{ \alpha_0 H + \sum_j^3 \alpha_j \tau_j \left( 1 - e^{-\frac{H}{\tau_j}} \right) \right\} \quad (S1.1)$$

$$AGTP_{CO_2}(TH) = A_{CO_2} \sum_{j=1}^2 \left\{ \alpha_0 c_j \left( 1 - \exp\left(\frac{-TH}{d_j}\right) \right) + \sum_{i=1}^3 \frac{\alpha_i \tau_i c_j}{\tau_i - d_j} \left( \exp\left(\frac{-H}{\tau_i}\right) - \exp\left(\frac{-TH}{d_j}\right) \right) \right\} \quad (S1.2)$$

For non-CO<sub>2</sub> gas i :

$$AGWP_i = A_i \tau_i \left( 1 - e^{-\frac{H}{\tau_i}} \right) \quad (S1.3)$$

$$AGTP_i(TH) = A_i \sum_{j=1}^2 \frac{\tau_j c_j}{\tau_i - d_j} \left( \exp\left(\frac{-TH}{\tau_i}\right) - \exp\left(\frac{-TH}{d_j}\right) \right) \quad (S1.4)$$

**S2 - Table S2: Detailed climate parameters values used for climate metrics**

| Variable                        | Definition                                                                                  | Unit                                 | Value                                                                                                                                                    | Uncertainty              | Uncertainty distribution type | Source                   |
|---------------------------------|---------------------------------------------------------------------------------------------|--------------------------------------|----------------------------------------------------------------------------------------------------------------------------------------------------------|--------------------------|-------------------------------|--------------------------|
| H                               | Time horizon                                                                                | Years                                | 1–1000                                                                                                                                                   | -                        | -                             | (Joos et al., 2013)      |
| <b>AGWP<sub>CO2</sub></b>       |                                                                                             |                                      |                                                                                                                                                          |                          |                               |                          |
| RE <sub>CO2</sub>               | Radiative efficiency in CO <sub>2</sub> mixing ratio                                        | W.m <sup>-2</sup> .ppb <sup>-1</sup> | 1.33 x 10 <sup>-5</sup>                                                                                                                                  | 0.16 x 10 <sup>-5</sup>  | Normal 1.645σ                 | (Forster et al., 2021)   |
| A <sub>CO2</sub>                | Radiative forcing scaling factor                                                            | W.m <sup>-2</sup> .kg <sup>-1</sup>  | 1.71 x 10 <sup>-15</sup>                                                                                                                                 | 0.21 x 10 <sup>-15</sup> | Normal 1.645σ                 | -                        |
| α <sub>0-3</sub>                | Coefficient for fraction of atmospheric CO <sub>2</sub> associated with a nominal timescale | Unitless                             | α <sub>0</sub> = 1- α <sub>1</sub> - α <sub>2</sub> - α <sub>3</sub> ;<br>α <sub>1</sub> = 0.2240 ;<br>α <sub>2</sub> = 0.2824 ; α <sub>3</sub> = 0.2763 | -                        | -                             | (Joos et al., 2013)      |
| τ <sub>1-3</sub>                | IRF <sub>CO2</sub> nominal timescale                                                        | Years                                | τ <sub>1</sub> = 394.4 ; τ <sub>2</sub> = 36.54 ;<br>τ <sub>3</sub> = 4.304                                                                              |                          |                               |                          |
| <b>AGWP<sub>CH4</sub></b>       |                                                                                             |                                      |                                                                                                                                                          |                          |                               |                          |
| RE <sub>CH4</sub>               | Radiative efficiency in CH <sub>4</sub> mixing ratio without indirect effects               | W.m <sup>-2</sup> .ppb <sup>-1</sup> | 3.89 x 10 <sup>-4</sup>                                                                                                                                  | 0.96 x 10 <sup>-4</sup>  | Normal 1.645σ                 | (Forster et al., 2021)   |
| τ <sub>CH4</sub> <sup>OH</sup>  | Total chemical lifetime of methane                                                          | Years                                | 9.7                                                                                                                                                      | 1.1                      | Normal 1σ                     | (Szopa, 2021)            |
| τ <sub>atm, CH4</sub>           | Total atmospheric lifetime                                                                  | Years                                | 9.1                                                                                                                                                      | 0.9                      | Normal 1σ                     | (Szopa, 2021)            |
| f <sub>CH4</sub>                | Feedback factor                                                                             | Unitless                             | 1.30                                                                                                                                                     | 0.07                     | Normal 1σ                     | (Thornhill et al., 2021) |
| τ <sub>CH4</sub>                | Perturbation lifetime                                                                       | Years                                | 11.8                                                                                                                                                     | 1.8                      | Normal 1.645σ                 | (Forster et al., 2021)   |
| f1                              | Tropospheric ozone indirect effect scaling                                                  | Unitless                             | 0.36                                                                                                                                                     | 0.18                     | Normal 1.645σ                 | (Forster et al., 2021)   |
| f2                              | Stratospheric water vapour indirect effect scaling                                          | Unitless                             | 0.103                                                                                                                                                    | 0.103                    | Normal 1.645σ                 | (Forster et al., 2021)   |
| A <sub>CH4</sub>                | Radiative forcing scaling factor with indirect effect                                       | W.m <sup>-2</sup> .kg <sup>-1</sup>  | 2.00 x 10 <sup>-13</sup>                                                                                                                                 | 0.49 x 10 <sup>-13</sup> | Normal 1.645σ                 | (Forster et al., 2021)   |
| Y                               | Fractional molar yield of CO <sub>2</sub> from CH <sub>4</sub> oxidation                    | Unitless                             | 0.75                                                                                                                                                     | [0.5 - 1]                | Uniform                       | (Forster et al., 2021)   |
| <b>AGWP<sub>N2O</sub></b>       |                                                                                             |                                      |                                                                                                                                                          |                          |                               |                          |
| RE <sub>N2O</sub>               | Radiative efficiency in N <sub>2</sub> O mixing ratio without indirect effects              | W.m <sup>-2</sup> .ppb <sup>-1</sup> | 3.19 x 10 <sup>-3</sup>                                                                                                                                  | 1.25 x 10 <sup>-3</sup>  | Normal 1.645σ                 | (Forster et al., 2021)   |
| A <sub>N2O</sub>                | Radiative forcing scaling factor with indirect effect                                       | W.m <sup>-2</sup> .kg <sup>-1</sup>  | 3.6 x 10 <sup>-13</sup>                                                                                                                                  | 1.4 x 10 <sup>-13</sup>  | Normal 1.645σ                 | (Forster et al., 2021)   |
| τ <sub>atm, N2O</sub>           | Mean atmospheric lifetime                                                                   | Years                                | 116                                                                                                                                                      | 9                        | Normal 1.645σ                 | (Canadell, 2021)         |
| f <sub>N2O</sub>                | Feedback factor                                                                             | Years                                | 0.94                                                                                                                                                     | 0.01                     | Normal 1.645σ                 | (Prather et al., 2015)   |
| τ <sub>N2O</sub>                | Perturbation lifetime                                                                       | Years                                | 109                                                                                                                                                      | 10                       | Normal 1.645σ                 | Canadell et al. (2021)   |
| -                               | Methane lifetime effect in ppb(CH <sub>4</sub> ) per ppb(N <sub>2</sub> O)                  | -                                    | -1.7                                                                                                                                                     | 1.7                      | Normal 1.645σ                 | (Forster et al., 2021)   |
| RE <sub>N2O</sub> <sup>O3</sup> | Upper stratospheric ozone depletion                                                         | W.m <sup>-2</sup> .ppb <sup>-1</sup> | 5.5 x 10 <sup>-4</sup>                                                                                                                                   | 0.4 x 10 <sup>-4</sup>   | Normal 1.645σ                 | (Forster et al., 2021)   |

| AGTP                      |                                                                                    |                                         |                                                           |      |                  |                        |
|---------------------------|------------------------------------------------------------------------------------|-----------------------------------------|-----------------------------------------------------------|------|------------------|------------------------|
| $\lambda$                 | Net feedback parameter                                                             | $W.m^{-2}.K^{-1}$                       | 1.16                                                      | 0.40 | Normal $1\sigma$ | (Forster et al., 2021) |
| $\Delta F_{2\times CO_2}$ | Effective radiative forcing of CO <sub>2</sub> doubling                            | $W.m^{-2}$                              | 3.93                                                      | 0.47 | Normal $1\sigma$ | (Forster et al., 2021) |
| ECS                       | Equilibrium climate sensitivity from constrained ensemble                          | $K.(W.m^{-2})^{-1}$                     | 0.76                                                      | 0.28 | Normal $1\sigma$ | (Forster et al., 2021) |
| $c_1$                     | ECS fractional contribution of the fast mode                                       | -                                       | $c_1 = 0.586$                                             | -    | Normal $1\sigma$ | (Forster et al., 2021) |
| $c_2$                     | ECS fractional contribution of the slow mode                                       | -                                       | $c_2 = 1 - c_1$                                           | -    | Normal $1\sigma$ | (Forster et al., 2021) |
| $d_1$                     | Fast relaxation time                                                               | Years                                   | $d_1 = 3.4$                                               | -    | Normal $1\sigma$ | (Forster et al., 2021) |
| $d_2$                     | slow relaxation time                                                               | Years                                   | $d_2 = 285$                                               | -    | Normal $1\sigma$ | (Forster et al., 2021) |
| CCf                       |                                                                                    |                                         |                                                           |      |                  |                        |
| $\gamma$                  | IRF <sub>CCf</sub> intensity term                                                  | $kgCO_2 yr^{-1} \text{ } ^\circ C^{-1}$ | $11.06 \times 10^{12}$                                    | -    | -                | (Gasser et al., 2017)  |
| $\beta_{1-3}$             | Coefficient for fraction of IRF <sub>CCf</sub> associated with a nominal timescale | Unitless                                | $\beta_1=0.6368$ ; $\beta_2=0.3322$ ;<br>$\beta_3=0.0310$ | -    | -                | (Gasser et al., 2017)  |
| $\kappa_{1-3}$            | IRF <sub>CCf</sub> nominal timescale                                               | Years                                   | $\kappa_1=2.376$ ; $\kappa_2=30.14$ ;<br>$\kappa_3=490.1$ | -    | -                | (Gasser et al., 2017)  |

**S3 - Analytical resolution of the convolution between  $IRF_{CH_4}$  and  $AG_{XXCO_2}$  describing to methane oxidation**

$$\begin{aligned}
 IRF_{CH_4} * AGWP_{CO_2}(H) &= Y \frac{M_{CO_2}}{M_{CH_4}} \frac{1}{\tau_{CH_4}^{OH}} \int_0^H e^{-\frac{t}{\tau_{CH_4}^{OH}}} \int_0^{H-t} A_{CO_2} IRF_{CO_2}(x) dx dt & (S3.1) \\
 &= Y \frac{M_{CO_2}}{M_{CH_4}} \frac{1}{\tau_{CH_4}^{OH}} A_{CO_2} \left[ \alpha_0 \tau_{CH_4}^{OH} \left( H + \tau_{CH_4}^{OH} \left( e^{-\frac{H}{\tau_{CH_4}^{OH}}} - 1 \right) \right) \right. \\
 &\quad \left. - \sum_i \left\{ \frac{\alpha_i \tau_i^2 \tau_{CH_4}^{OH}}{\tau_i - \tau_{CH_4}^{OH}} \left( e^{-\frac{H}{\tau_i}} - e^{-\frac{H}{\tau_{CH_4}^{OH}}} \right) + \alpha_i \tau_i \tau_{CH_4}^{OH} \left( 1 - e^{-\frac{H}{\tau_{CH_4}^{OH}}} \right) \right\} \right]
 \end{aligned}$$

$$\begin{aligned}
 IRF_{CH_4} * AGTP_{CO_2}(H) &= Y \frac{M_{CO_2}}{M_{CH_4}} \frac{1}{\tau_{CH_4}^{OH}} \int_0^H e^{-\frac{t}{\tau_{CH_4}^{OH}}} \int_0^{H-t} A_{CO_2} IRF_{CO_2}(x) IRF_T(t-x) dx dt & (S3.2) \\
 &= Y \frac{M_{CO_2}}{M_{CH_4}} \frac{1}{\tau_{CH_4}^{OH}} A_{CO_2} \times ECS \\
 &\quad \times \sum_{j=1}^2 \left\{ \frac{\alpha_0 c_j \tau_{CH_4}^{OH} d_j}{\tau_{CH_4}^{OH} - d_j} \left( e^{-\frac{H}{\tau_{CH_4}^{OH}}} - e^{-\frac{H}{d_j}} \right) + \alpha_0 c_j \tau_{CH_4}^{OH} \left( 1 - e^{-\frac{H}{\tau_{CH_4}^{OH}}} \right) \right. \\
 &\quad \left. + \sum_{i=1}^3 \frac{\alpha_i \tau_i^2 c_j \tau_{CH_4}^{OH}}{(d_j - \tau_i)(\tau_i - \tau_{CH_4}^{OH})} \left( e^{-\frac{H}{\tau_i}} - e^{-\frac{H}{\tau_{CH_4}^{OH}}} \right) + \frac{\alpha_i \tau_i c_j d_j \tau_{CH_4}^{OH}}{(d_j - \tau_i)(\tau_{CH_4}^{OH} - d_j)} \left( e^{-\frac{H}{\tau_{CH_4}^{OH}}} - e^{-\frac{H}{d_j}} \right) \right\}
 \end{aligned}$$

**S4 - Table S4: Fitting parameters of model responses in CO<sub>2</sub> ( $IRF_{CO_2}$ ) for a 100 GtC emission pulse added to a constant background of 389 ppm from (Joos et al., 2013, Supplementary Information, Table S1) considered to compute uncertainty range**

| model                 | $n_{years}$ | $a_0$     | $a_1$     | $a_2$     | $a_3$     | $\tau_1$  | $\tau_2$  | $\tau_3$  |
|-----------------------|-------------|-----------|-----------|-----------|-----------|-----------|-----------|-----------|
| NCAR CSM1.4           | 289         | 2.935E-07 | 3.665E-01 | 3.542E-01 | 2.793E-01 | 1.691E+03 | 2.836E+01 | 5.316E+00 |
| HadGEM2-ES            | 101         | 4.340E-01 | 1.973E-01 | 1.889E-01 | 1.798E-01 | 2.307E+01 | 2.307E+01 | 3.922E+00 |
| MPI-ESM               | 101         | 1.252E-07 | 5.864E-01 | 1.826E-01 | 2.310E-01 | 1.781E+02 | 9.039E+00 | 8.989E+00 |
| Bern3D-LPJ            | 1000        | 6.345E-10 | 5.150E-01 | 2.631E-01 | 2.219E-01 | 1.955E+03 | 4.583E+01 | 3.872E+00 |
| Bern3D-LPJ (ensemble) | 585         | 2.796E-01 | 2.382E-01 | 2.382E-01 | 2.440E-01 | 2.762E+02 | 3.845E+01 | 4.928E+00 |
| Bern2.5D-LPJ          | 1000        | 2.362E-01 | 9.866E-02 | 3.850E-01 | 2.801E-01 | 2.321E+02 | 5.850E+01 | 2.587E+00 |
| CLIMBER2-LPJ          | 1000        | 2.318E-01 | 2.756E-01 | 4.900E-01 | 2.576E-03 | 2.726E+02 | 6.692E+00 | 6.692E+00 |
| DCESS                 | 1000        | 2.159E-01 | 2.912E-01 | 2.410E-01 | 2.518E-01 | 3.799E+02 | 3.631E+01 | 3.398E+00 |
| GENIE (ensemble)      | 1000        | 2.145E-01 | 2.490E-01 | 1.924E-01 | 3.441E-01 | 2.701E+02 | 3.932E+01 | 4.305E+00 |
| LOVECLIM              | 1000        | 8.539E-08 | 3.606E-01 | 4.503E-01 | 1.891E-01 | 1.596E+03 | 2.171E+01 | 2.281E+00 |
| MESMO                 | 1000        | 2.848E-01 | 2.938E-01 | 2.382E-01 | 1.831E-01 | 4.543E+02 | 2.500E+01 | 2.014E+00 |
| UVic2.9               | 1000        | 3.186E-01 | 1.748E-01 | 1.921E-01 | 3.145E-01 | 3.046E+02 | 2.656E+01 | 3.800E+00 |
| ACC2                  | 985         | 1.779E-01 | 1.654E-01 | 3.796E-01 | 2.772E-01 | 3.862E+02 | 3.689E+01 | 3.723E+00 |
| Bern-SAR              | 1000        | 1.994E-01 | 1.762E-01 | 3.452E-01 | 2.792E-01 | 3.331E+02 | 3.969E+01 | 4.110E+00 |
| MAGICC6 (ensemble)    | 604         | 2.051E-01 | 2.533E-01 | 3.318E-01 | 2.098E-01 | 5.961E+02 | 2.197E+01 | 2.995E+00 |
| TOTEM2                | 984         | 7.177E-06 | 2.032E-01 | 6.995E-01 | 9.738E-02 | 8.577E+04 | 1.118E+02 | 1.583E-02 |
| multi-model mean      | 1000        | 2.173E-01 | 2.240E-01 | 2.824E-01 | 2.763E-01 | 3.944E+02 | 3.654E+01 | 4.304E+00 |

In this study, all models that compute IRF CO<sub>2</sub> at least up to 500 years (long-term time horizon in climate metrics) have their fit extended up to 1000 years for the uncertainty range. In other words, fits from NCAR CSM1.4, HadGEM2-ES and MPI-ESM are not considered here.

#### S5: IRF<sub>T</sub> to match MAGICC's behaviour used in AR6

[https://gitlab.com/magicc/ar6-wg1-plots-and-processing/-/blob/main/notebooks/calculate-temperature-irf-for-ch6/110\\_calculate\\_temperature\\_irf\\_from\\_2xCO2.ipynb?plain=0&blame=1](https://gitlab.com/magicc/ar6-wg1-plots-and-processing/-/blob/main/notebooks/calculate-temperature-irf-for-ch6/110_calculate_temperature_irf_from_2xCO2.ipynb?plain=0&blame=1)

See out [33]
